# Supplementary material
Source: MDPI journal article supplement (https://www.mdpi.com/2673-8007/2/1/7)
Supplement: s1 [file s1]

### Supplementary Data

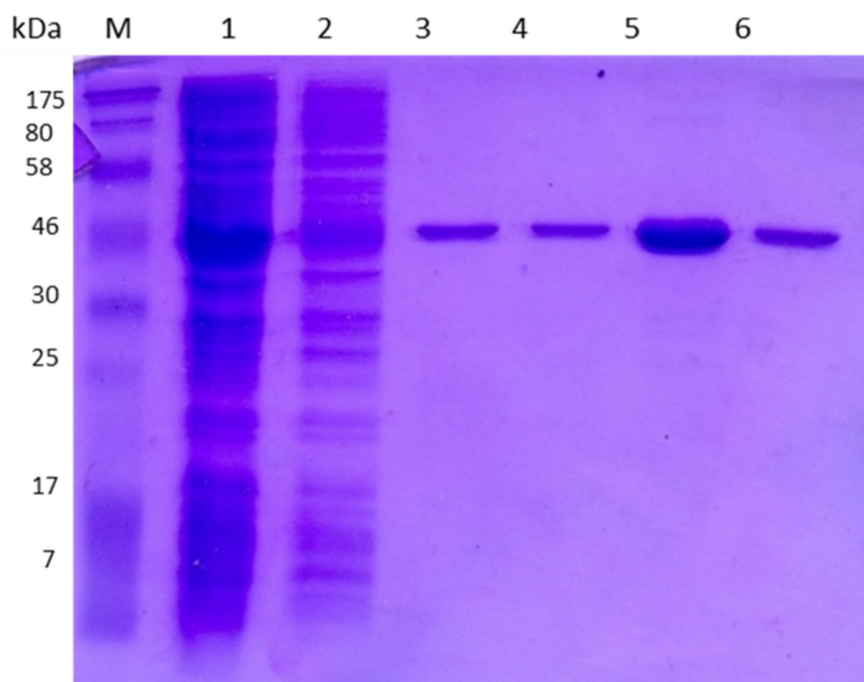

**Figure S1.** SDS-PAGE protein analysis. Purification of overexpressed GDO from *P. phenanthrenivorans* Sphe3. Lane M, protein molecular mass marker in kDa; lane 1, cell-free crude extract from *E. coli* BL21/pET29c::gtdA; lane 2, column chromatography flow-through; lanes 3,4,5 and 6, purified GDO protein (41 kDa) fractions eluted with varying concentration of imidazole.

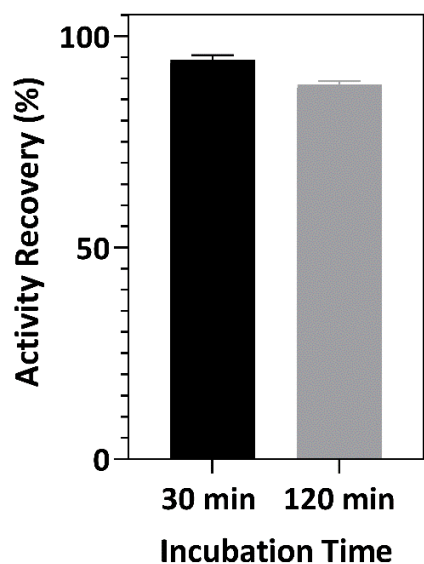

**Figure S2.** Immobilization parameters optimization in relation to incubation time.

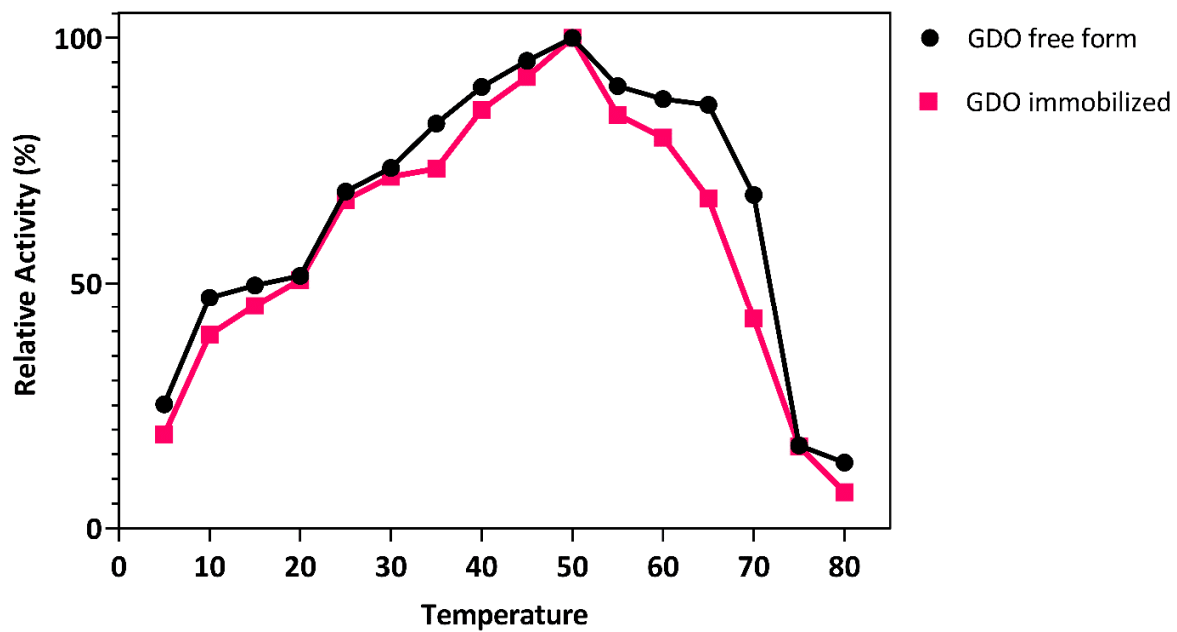

**Figure S3.** Effect of temperature on the activity of GDO. Free form GDO (black) and GDO after immobilization (coloured). The activities at the optimum temperature were set to 100% for each case.
